# Supplementary material
Source: publisher figshare collection journal article supplement (https://frontiersin.figshare.com/ndownloader/files/13644077)
Supplement: Supplementary file 1 [file 13644077]

***Supplementary Material III***

**Re-building Communities: Voluntary Resettlement from Wildlife Reserves in India**

**Authors**: Krithi K. Karanth*, Sahila Kudalkar, Shivangi Jain

*** Correspondence:** Krithi K. Karanth, krithi.karanth@cwsorg.in

**Reserve-wise demographic, socio-economic, and relocation related characteristics of surveyed respondents**

| Characteristics | Tadoba- Andhari TR1 | Kawal  TR | Wayanad WLS2 | Nagarahole  TR |
| --- | --- | --- | --- | --- |
| State | Maharashtra | Telangana | Kerala | Karnataka |
| Year of  establishment 3 | 19954 | 20115 | 1973 | 20076 |
| Number of interior villages at establishment | 6 | 23 | 32 | 55 |
| Area (km2) | 625 | 892 | 344 | 644 |
| Dominant Vegetation | Tropical dry deciduous forest | Tropical dry deciduous forest | Moist deciduous forest | Tropical moist, dry deciduous forest |
| Human population density in adjoining districts (number of persons/km2) | Chandrapur: 94 | Adilabad: 170 | Wayanad: 383 | Kodagu: 135, Mysore: 443 |
| Survey year | 2013 | 2014 | 2012 | 2014 |
| Number of villages surveyed | 5 | 2 | 8 | 3 |
| Total respondents | 262 | 115 | 88 | 127 |
| Male:Female respondents | 56:44 | 75:25 | 70:30 | 57:43 |
| Average respondent age in years (range) | 41  (18 – 82) | 39  (20 – 76) | 44  (18 – 83) | 39  (16 – 85) |
| Average respondent education in years (range) | 4.70  (0 – 15) | 2.00  (0 – 15) | 5.54  (0 – 12) | 4.29  (0 – 13) |
| Origin (% born here) | 97% | 95% | 99% | 94% |
| Average household size (range) | 3  (1 – 4) | 4  (1 – 8) | 4  (1 – 8) | 4  (1 – 8) |
| Households consisting of illiterate adults | 15% | 43% | 10% | 12% |
| Annual expenditure on education (US$) (range) | 142  (16 – 1164) | 34  (0 – 932) | 368  (0 – 3881) | 18  (0 – 186) |
| Labor days lost to illness annually (range) | 14  (0 – 150) | 29  (0 – 213) | 13  (0 – 75) | 23  (0 – 213) |
| Annual average healthcare expenditure (US$) (range) | 69  (0 – 5434) | 87  (0 – 1164) | 59  (0 – 474) | 29  (0 – 563) |
| Households owning agricultural land | 62% | 71% | 57% | 21% |
| Average land size among agricultural landowners in acres (range) | 3.60  (0.50 – 25.00) | 5.00  (0.10 – 16.90) | 1.58  (0.01 – 6.00) | 0.31  (0.10 – 12.00) |
| Top crops (reported by >10% of households) | Rice, Soya | Rice, Pulses, Maize, Pigeon pea, Cotton Vegetables | Rice | Jowar |
| Average number of months of food for self-consumption from farmland (range) | 11.03  (0 – 12) | 6.00  (0 – 12) | 4.44  (0 – 12) | 7.00  (0 – 12) |
| Households that own livestock | 87% | 78% | 56% | 60% |
| Livestock owners reporting depredation | 68% | 41% | 39% | 75% |
| Do you want to move out of the reserve? | 81.30% | 99% | 100% | NA |
| Changed decision recently (%) | 3.10% | 24% | 100% | NA |
| From those that changed decision, yes to no (%) | 40% | 0% | 0% | NA |
| From those that changed decision, no to yes (%) | 60% | 24% | 100% | NA |
| Reasons for change (yes to no, from those that report decision change) |  |  |  |  |
| Self interest | 0% | 61% | 84% |  |
| NTCA Package | 60% | 71% | 94% |  |
| Human-wildlife conflict | 60% | 39% | 22% |  |
| Poor resources | 20% | 68% | 90% |  |
| Poor facilities and infrastructure | 40% | 82% | 9% |  |
| Pressure from the government | 0% | 0% | 41% |  |
| Interaction with Revenue department | 0% | 0% | 74% |  |
| Interactions with other villagers | 0% | 57% | 2% |  |
| Visit to potential site | 0% | 29% | 2% |  |
| Interaction with other resettled people | 0% | 29% | 2% |  |
| Have you applied for relocation? | 66% | 99% | NA | 97% |
| Have you received compensation? | 38% | 0% | 100% | 61% |

1 Tiger Reserve, 2 Wildlife Sanctuary, 3 Refers to the most recent notification of upgraded protection status, 4 Tadoba was notified as a wildlife sanctuary in 1935, as a national park in 1955, combined with Andhari WLS in 1986, and upgraded to a tiger reserve in 1995, 5 Kawal was notified as a Game Reserve in 1965, a wildlife sanctuary in 1999, and a tiger reserve in 2011, 6Nagarahole was notified as a national park in 1983, and a tiger reserve in 2007
